# Supplementary material
Source: PubMed Central journal article supplement (PMC2797040)
Supplement: fj.09-140145_1.pdf [file fj.09-140145_1.pdf]

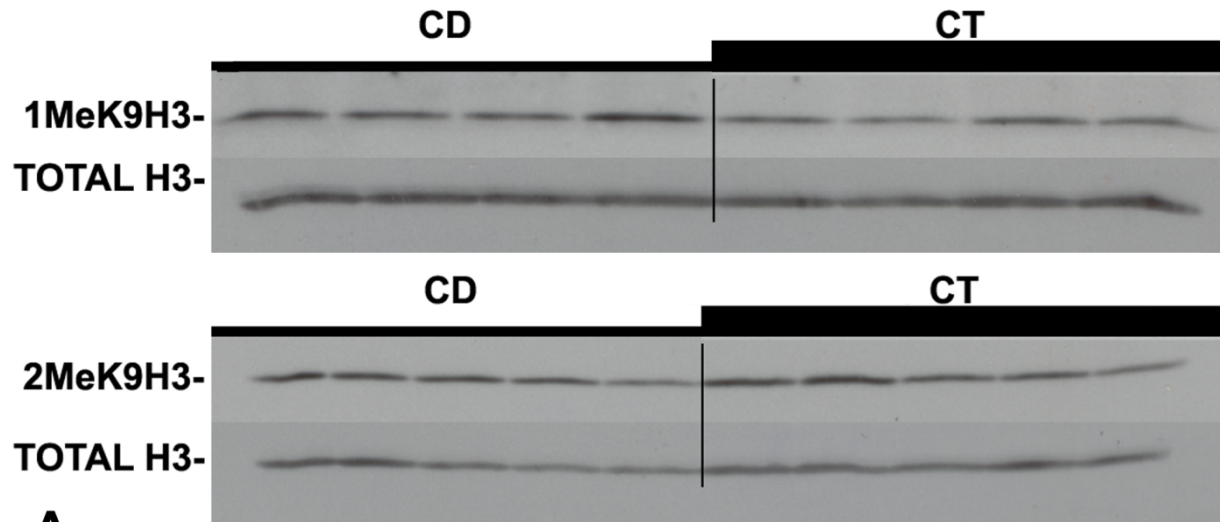

**A**

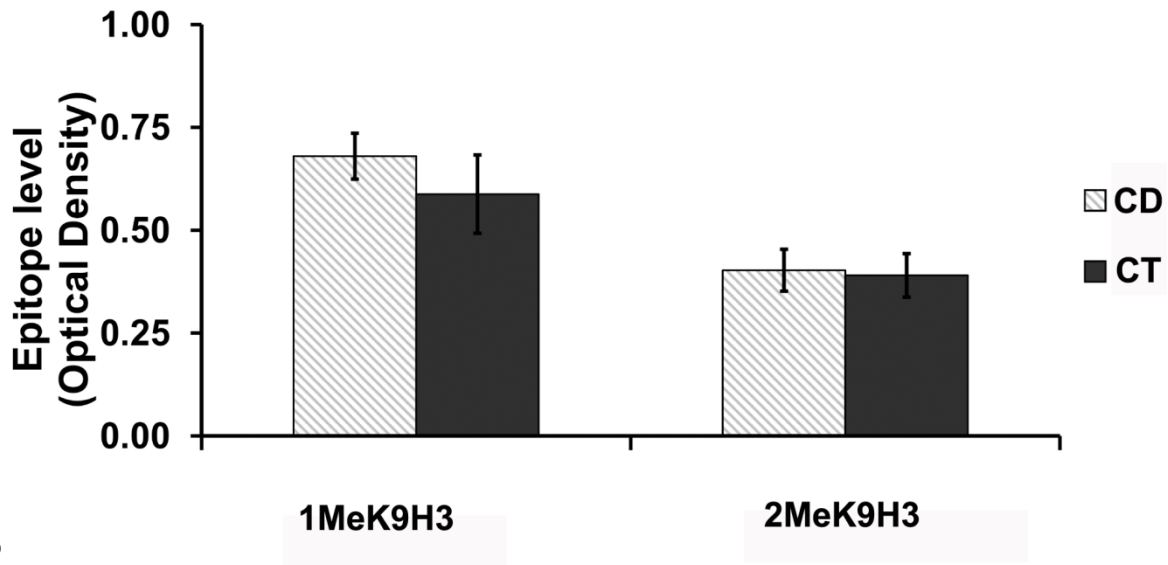

**B**

**Supplemental Figure. Choline deficiency does not change the 1meK9H3 and 2meK9H3 levels in the whole fetal brain histone extracts.**

Pregnant mice were fed a choline deficient diet (CD) or a control diet (CT), from embryonic day 12 (E12) to embryonic day 17 (E17). E17 fetal brains were used to assess the relative levels of 1meK9H3 and 2meK9H3 residues in whole brain histone extracts (n=7 independent samples per treatment; immuno-fluorescent labeling and western-blotting, respectively). No significant changes were found in the OD of 1meK9H3 and 2meK9H3 immunoreactive bands relative to the total H3 levels (1meK9H3: CD  $0.75 \pm 0.19$  versus CT  $0.52 \pm 0.09$ ; 2meK9H3: CD  $0.40 \pm 0.11$  versus CT  $0.39 \pm 0.12$ ) (panels A, B). Values are given as relative MOD levels (see Experimental Procedures). Grey bars, CD; black bars, CT. Error bars indicate standard error. (\*,  $p < 0.05$ ; \*\*,  $p < 0.01$ , by Student's t-test).
